# Supplementary material for: Molecular docking sites designed for the generation of highly crystalline covalent organic frameworks
Source: Springer Nature journal article supplement (doi:10.1038/nchem.2444), 2016-02-08
Supplement: 41557_2016_BFnchem2444_MOESM24_ESM.cif [file 41557_2016_BFnchem2444_MOESM24_ESM.cif]

data_
_chemical_name_mineral ?TT 11-BM?
_cell_length_a 41.19939
_cell_length_b 41.19939
_cell_length_c 4.58283
_cell_angle_alpha 90
_cell_angle_beta 90
_cell_angle_gamma 120
_cell_volume 6736.681
_symmetry_space_group_name_H-M P6
loop_
	_symmetry_equiv_pos_as_xyz
	 'x, y, z '
	 '-x+y, -x, z '
	 '-y, x-y, z '
	 'y, -x+y, z '
	 'x-y, x, z '
	 '-x, -y, z '
loop_
_atom_site_label
_atom_site_type_symbol
_atom_site_symmetry_multiplicity
_atom_site_fract_x
_atom_site_fract_y
_atom_site_fract_z
_atom_site_occupancy
_atom_site_B_iso_or_equiv
C C   6 0.48283 0.48405 0.51029 1 0.98378
C2 C   6 0.44769 0.48463 0.52227 1 0.98378
C3 C   6 0.41863 0.46141 0.33396 1 0.98378
C4 C   6 0.38599 0.46257 0.32626 1 0.98378
C5 C   6 0.38138 0.48685 0.51208 1 0.98378
C6 C   6 0.40984 0.5092 0.70908 1 0.98378
C7 C   6 0.4424 0.50797 0.71264 1 0.98378
H8 H   6 0.4654 0.52621 0.8574 1 0.98378
C9 C   6 0.47764 0.44634 0.50266 1 0.98378
C10 C   6 0.44884 0.41762 0.66477 1 0.98378
C11 C   6 0.44353 0.38195 0.664 1 0.98378
C12 C   6 0.46702 0.37396 0.49751 1 0.98378
C13 C   6 0.49485 0.40214 0.32474 1 0.98378
C14 C   6 0.50016 0.43756 0.33149 1 0.98378
N15 N   6 0.3501 0.49026 0.50772 1 0.98378
C16 C   6 0.31779 0.4621 0.45334 1 0.98378
N17 N   6 0.46169 0.33844 0.50134 1 0.98378
C18 C   6 0.48975 0.33367 0.45864 1 0.98378
C19 C   6 0.48485 0.29741 0.4456 1 0.98378
H20 H   6 0.42279 0.44301 0.1853 1 1.47567
H21 H   6 0.36441 0.44635 0.16345 1 1.47567
H22 H   6 0.40507 0.52734 0.85558 1 1.47567
H23 H   6 0.43034 0.42386 0.79398 1 1.47567
H24 H   6 0.42147 0.35938 0.79196 1 1.47567
H25 H   6 0.51111 0.39523 0.17369 1 1.47567
H26 H   6 0.52224 0.45961 0.2008 1 1.47567
H27 H   6 0.31319 0.43343 0.42717 1 1.47567
H28 H   6 0.51875 0.35739 0.44246 1 1.47567
C29 C   6 0.51195 0.28727 0.44343 1 0.98378
C30 C   6 0.49565 0.2485 0.44385 1 0.98378
C31 C   6 0.45639 0.22977 0.44215 1 0.98378
S32 S   6 0.43983 0.26018 0.44513 1 0.98378
C33 C   6 0.28635 0.46704 0.44274 1 0.98378
C34 C   6 0.24907 0.44008 0.43881 1 0.98378
S35 S   6 0.29417 0.51209 0.45012 1 0.98378
H36 H   6 0.54173 0.30775 0.445 1 1.47567
H37 H   6 0.23935 0.41023 0.43716 1 1.47567
